# Supplementary material
Source: HighWire-hosted journal article supplement (https://tech.snmjournals.org/highwire/filestream/8659/field_highwire_adjunct_files/0/180851_Supplemental_Data.pdf)
Supplement: 180851_Supplemental_Data.pdf [file 180851_Supplemental_Data.pdf]

| Study ID | Height (cm) | Weight (kg) | Body surface area | MDRD GFR (ml/min) |
|----------|-------------|-------------|-------------------|-------------------|
| CIRU004  | 172.7       | 84.8        | 2.04              | 87.01             |
| CIRU005  | 172.7       | 108.9       | 2.29              | 119.00            |
| CIRU006  | 170.3       | 60.2        | 1.64              | 82.29             |
| CIRU007  | 174.2       | 92.1        | 2.15              | 105.71            |
| CIRU008  | 189         | 118.5       | 2.54              | 123.54            |
| CIRU009  | 174         | 101.4       | 2.24              | 113.78            |
| CIRU011  | 170         | 102         | 2.25              | 149.04            |
| CIRU012  | 160.02      | 63.2        | 2.20              | 78.94             |
| CIRU013  | 160         | 103.6       | 2.26              | 77.45             |
| CIRU014  | 172.72      | 80.87       | 1.76              | 64.25             |
| CIRU015  | 185.4       | 76.4        | 1.98              | 98.85             |
| CIRU016  | 160         | 73.6        | 1.84              | 127.28            |
| CIRU018  | 170.2       | 83.46       | 2.04              | 101.67            |
| CIRU019  | 160         | 72.12       | 1.83              | 67.46             |
| CIRU020  | 170.2       | 72.57       | 1.86              | 124.77            |
| CIRU021  | 175.7       | 104.6       | 2.18              | 119.75            |
| CIRU022  | 180.34      | 76.7        | 1.98              | 51.57             |
| CIRU023  | 170.18      | 111.13      | 2.33              | 112.85            |
| CIRU024  | 165.1       | 50.35       | 1.51              | 76.96             |
| CIRU025  | 175.7       | 108.07      | 2.34              | 106.98            |
| CIRU027  | 176.5       | 79.38       | 1.85              | 169.56            |
| CIRU028  | 153.9       | 77.8        | 1.84              | 96.33             |
| CIRU029  | 185         | 99.7        | 2.29              | 128.05            |
| CIRU031  | 172.7       | 89          | 2.09              | 105.56            |
| CIRU032  | 175.3       | 76.66       | 1.87              | 97.18             |
| CIRU033  | 180.3       | 84.37       | 2.07              | 82.78             |
| CIRU034  | 195.6       | 78.02       | 2.05              | 94.29             |
| CIRU035  | 195.6       | 78.02       | 2.05              | 88.04             |
| CIRU038  | 160         | 96.62       | 2.10              | 99.30             |
| CIRU039  | 179.2       | 66.7        | 1.81              | 87.09             |
| CIRU040  | 179.3       | 81.6        | 2.05              | 77.96             |
| CIRU041  | 165.1       | 79.1        | 1.93              | 71.22             |
| CIRU042  | 175         | 134         | 2.63              | 94.38             |
| CIRU043  | 172         | 98          | 2.21              | 119.43            |
| CIRU044  | 172         | 92          | 2.14              | 95.19             |
| CIRU045  | 154.9       | 66.45       | 1.91              | 78.22             |
| CIRU046  | 170.1       | 82.1        | 1.99              | 88.00             |
| CIRU047  | 170.1       | 68.03       | 1.80              | 88.97             |
| CIRU048  | 165.1       | 81.6        | 1.97              | 77.59             |
| CIRU050  | 180         | 76          | 2.20              | 137.56            |

|         |       |        |      |        |
|---------|-------|--------|------|--------|
| CIRU051 | 175.2 | 86.18  | 2.07 | 79.41  |
| CIRU052 | 175.3 | 74.9   | 1.92 | 92.07  |
| CIRU053 | 175.3 | 74.9   | 1.92 | 75.71  |
| CIRU054 | 167.6 | 78.9   | 1.94 | 58.42  |
| CIRU055 | 168.9 | 76.2   | 1.91 | 83.49  |
| CIRU056 | 167.6 | 78.9   | 1.98 | 47.42  |
| CIRU057 | 180   | 76.7   | 2.00 | 77.44  |
| CIRU059 | 179.7 | 140.8  | 2.73 | 107.66 |
| CIRU060 | 182.9 | 87.9   | 2.15 | 80.66  |
| CIRU061 | 154.9 | 71.26  | 1.73 | 67.26  |
| CIRU062 | 176.5 | 114.76 | 2.36 | 112.82 |
| CIRU063 | 180.3 | 101.3  | 2.28 | 112.45 |
| CIRU064 | 167.6 | 81.29  | 1.97 | 75.77  |
| CIRU066 | 180.3 | 101.3  | 2.35 | 86.02  |

| CKD-EPI (Scr) eGFR (mL/min) | CKD-EPI (cysC) eGFR (mL/min) |
|-----------------------------|------------------------------|
| 94.45                       | 72.26                        |
| 121.50                      | 77.92                        |
| 94.11                       | 85.91                        |
| 103.42                      | 126.94                       |
| 137.49                      | 165.04                       |
| 128.99                      | 139.97                       |
| 129.11                      | 137.76                       |
| 92.32                       | 102.86                       |
| 86.33                       | 62.21                        |
| 65.22                       | 59.32                        |
| 105.46                      | 128.20                       |
| 115.49                      | 95.96                        |
| 111.69                      | 104.60                       |
| 74.30                       | 95.14                        |
| 110.47                      | 111.62                       |
| 138.38                      | 114.76                       |
| 51.58                       | 49.29                        |
| 128.72                      | 96.10                        |
| 87.18                       | 95.77                        |
| 124.45                      | 101.17                       |
| 132.94                      | 130.35                       |
| 101.74                      | 101.22                       |
| 123.52                      | 87.50                        |
| 112.74                      | 45.67                        |
| 96.31                       | 82.38                        |
| 96.33                       | 130.94                       |
| 100.50                      | 82.75                        |
| 93.53                       | 82.75                        |
| 107.87                      | 82.86                        |
| 92.04                       | 109.57                       |
| 81.32                       | 69.42                        |
| 76.85                       | 98.42                        |
| 103.15                      | 130.52                       |
| 110.54                      | 104.15                       |
| 101.24                      | 71.74                        |
| 87.84                       | 95.48                        |
| 87.74                       | 116.46                       |
| 93.42                       | 106.40                       |
| 84.01                       | 99.73                        |
| 119.59                      | 101.79                       |

|        |        |
|--------|--------|
| 81.93  | 77.49  |
| 98.47  | 122.55 |
| 80.22  | 114.65 |
| 63.89  | 62.97  |
| 97.24  | 67.33  |
| 51.35  | 42.97  |
| 83.96  | 48.36  |
| 118.82 | 136.98 |
| 88.10  | 112.66 |
| 72.37  | 44.94  |
| 124.02 | 95.72  |
| 118.42 | 113.77 |
| 76.97  | 72.03  |
| 91.05  | 77.65  |

| CKD-EPI (Scr and cysC) eGFR (mL/min) | UV/P DTPA mGFR (mL/min) | Plasma DTPA mGFR (ml/min) |
|--------------------------------------|-------------------------|---------------------------|
| 82.19                                | 55.15                   | 84.74                     |
| 97.01                                | 85.45                   | 97.67                     |
| 89.86                                | 80.80                   | 87.04                     |
| 119.18                               | 34.95                   | 189.78                    |
| 154.79                               | 133.25                  | 140.24                    |
| 135.30                               | 144.60                  | 141.31                    |
| 137.79                               | 262.60                  | 136.15                    |
| 97.36                                | 61.30                   | 61.97                     |
| 72.21                                | 72.60                   | 69.47                     |
| 62.16                                | 46.95                   | 58.33                     |
| 120.26                               | 108.85                  | 134.12                    |
| 105.78                               | 123.95                  | 147.83                    |
| 108.73                               | 88.50                   | 130.54                    |
| 84.52                                | 96.45                   | 88.07                     |
| 112.81                               | 145.85                  | 91.32                     |
| 125.56                               | 76.35                   | 115.69                    |
| 50.11                                | 60.20                   | 60.17                     |
| 110.69                               | 106.40                  | 116.07                    |
| 93.55                                | 112.80                  | 83.31                     |
| 111.15                               | 122.85                  | 125.83                    |
| 135.63                               | 247.30                  | 143.98                    |
| 102.95                               | 93.20                   | 71.16                     |
| 104.24                               | 76.75                   | 109.37                    |
| 70.43                                | 73.05                   | 66.17                     |
| 90.11                                | 60.05                   | 65.76                     |
| 111.82                               | 125.50                  | 95.17                     |
| 91.35                                | 79.35                   | 84.71                     |
| 88.15                                | 61.55                   | 88.11                     |
| 94.73                                | 80.40                   | 86.26                     |
| 102.26                               | 108.40                  | 94.12                     |
| 75.14                                | 90.10                   | 64.05                     |
| 87.73                                | 66.60                   | 55.08                     |
| 116.81                               | 42.30                   | 170.00                    |
| 109.05                               | 99.95                   | 144.04                    |
| 85.06                                | 60.70                   | 75.26                     |
| 92.31                                | 77.50                   | 86.64                     |
| 105.41                               | 57.50                   | 103.21                    |
| 101.51                               | 60.90                   | 82.38                     |
| 92.32                                | 61.95                   | 67.59                     |
| 111.42                               | 153.80                  | 106.35                    |

|        |        |        |
|--------|--------|--------|
| 80.13  | 53.75  | 80.95  |
| 113.57 | 90.20  | 86.43  |
| 97.56  | 75.95  | 83.97  |
| 62.87  | 53.90  | 56.16  |
| 79.36  | 51.00  | 69.23  |
| 45.96  | 35.45  | 52.45  |
| 62.53  | 75.10  | 76.41  |
| 128.28 | 114.50 | 130.65 |
| 100.30 | 83.50  | 85.26  |
| 56.30  | 53.80  | 63.75  |
| 109.04 | 79.00  | 110.57 |
| 117.35 | 73.85  | 131.33 |
| 75.03  | 63.45  | 60.88  |
| 83.93  | 85.65  | 98.43  |
